# Supplementary material
Source: Elsevier journal article supplement (https://www.sciencedirect.com/science/article/pii/S0300893213003230)
Supplement: mmc1 [file mmc1.pdf]

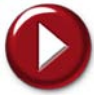

**Material adicional**

---

Mortalidad intrahospitalaria por infarto agudo de miocardio.  
Relevancia del tipo de hospital y la atención dispensada.  
Estudio RECALCAR

Vicente Bertomeu <sup>a</sup>, Ángel Cequier <sup>b</sup>, José L. Bernal <sup>c</sup>, Fernando Alfonso <sup>d</sup>,  
Manuel P. Anguita <sup>e</sup>, Javier Muñoz <sup>f</sup>, José A. Barrabés <sup>g</sup>, David García-Dorado <sup>g</sup>,  
Javier Goicolea <sup>h</sup> y Francisco J. Elola <sup>i,\*</sup>

<sup>a</sup>*Servicio de Cardiología, Hospital San Juan, Universidad Miguel Hernández, Alicante, España*

<sup>b</sup>*Àrea de Malalties del Cor, Hospital Universitari de Bellvitge, Universitat de Barcelona, L'Hospitalet de Llobregat, Barcelona, España*

<sup>c</sup>*Control de Gestión, Hospital 12 de Octubre, Madrid, España*

<sup>d</sup>*Departamento de Cardiología Intervencionista, Instituto Cardiovascular, Hospital Universitario Clínico San Carlos, Madrid, España*

<sup>e</sup>*Servicio de Cardiología, Hospital Reina Sofía, Córdoba, España*

<sup>f</sup>*Instituto de Ciencias de la Salud, Universidad de A Coruña, A Coruña, España*

<sup>g</sup>*Servicio de Cardiología, Hospital Universitario Vall d'Hebron, Universidad Autónoma de Barcelona, Barcelona, España*

<sup>h</sup>*Unidad de Cardiología Intervencionista, Servicio de Cardiología, Hospital Puerta de Hierro, Majadahonda, Madrid, España*

<sup>i</sup>*Elola Consultores, Madrid, España*

---

### **Origen de los datos. Bases de datos del Sistema Nacional de Salud**

Como fuente documental para este trabajo se ha utilizado el conjunto mínimo básico de datos (CMBD), que incluye todas las altas producidas en los hospitales públicos generales (hospitales de la red de utilización pública y/o administrados públicamente o con concierto sustitutorio). Los diagnósticos y procedimientos se codifican mediante la novena revisión de la Clasificación Internacional de Enfermedades-modificación clínica (CIE-9-MC)<sup>1</sup>.

El CMBD recoge 683.789 episodios de alta con diagnóstico principal de «enfermedad del área del corazón» en los hospitales del SNS en los años 2009 y 2010, entendiendo por enfermedades del área del corazón aquellas cuyo diagnóstico principal está comprendido en los dígitos de la CIE-9-MC que se recogen en la tabla 1<sup>2</sup>.

Entre estos registros del CMBD de los años 2009 y 2010, se han seleccionado los 100.993 episodios con «diagnóstico principal» infarto agudo de miocardio (IAM): códigos 410.\*1 de la CIE-9-CM, que incluye IAM con y sin elevación persistente del segmento ST, exceptuando los episodios de atención ulterior (aquellos otros que, siempre dentro de las primeras 8 semanas, tuviera el paciente para observación, estudio, seguimiento, convalecencia o tratamiento<sup>3,4</sup>); 38.041 casos (el 37,7% del total) tenían como diagnóstico principal «infarto subendocárdico» (410.71).

### **Ajuste por riesgo de la mortalidad intrahospitalaria por infarto agudo de miocardio**

Para mejorar la consistencia de los datos y eliminar registros con problemas de calidad en el diagnóstico<sup>5,6</sup>, se ha excluido a los pacientes menores de 35 o mayores de 94 años, con estancia < 1 día y los atendidos en hospitales con menos de 25 episodios anuales (1.319, 3.445 y 1.061 casos respectivamente, sin contar los eliminados por más de un criterio). La muestra resultante está constituida por 95.177 episodios, con una tasa bruta de mortalidad intrahospitalaria del 7,26%, calculada como el porcentaje del total de episodios con «motivo de alta» 4 (muerte).

Puesto que existen características propias, tanto de los pacientes como de los centros donde se los atiende, que influyen en los resultados asistenciales con independencia de la atención dispensada, la comparación entre hospitales y/o servicios requiere un ajuste por riesgo que evite la interferencia de estos factores en la medida de los resultados<sup>7</sup>.

### **Ajuste del modelo *Institute of Clinical Evaluative Sciences* 1999 mediante regresión logística binaria**

Con el objeto de controlar el efecto de las diferencias de la casuística de los pacientes y el funcionamiento de los centros, la mortalidad intrahospitalaria (variable resultado del estudio) se ha ajustado por riesgo, utilizando la metodología del modelo publicado por el *Institute of Clinical Evaluative Sciences* (ICES) de Ontario (Canadá), en 1999<sup>5</sup> y considerando los factores de riesgo que se describen en la tabla 2.

Para estimar la mortalidad esperada, se ha utilizado el modelo ICES 1999, mediante regresión logística binaria, utilizando SPSS v15.0, con método de selección de variables: «Adelante. Razón de verosimilitud», método de contraste de las variables categóricas: «Indicador», categoría de referencia: «Primera», número máximo de iteraciones: 20, constante: Sí, e intervalos de confianza del 95% (IC95%) de las *odds ratio* (OR).

Los resultados obtenidos, que se muestran en la tabla 3, indican buenos ajuste y discriminación. El valor  $p < 0,05$  del estadístico de Hosmer-Lemeshow<sup>8</sup> indica mala calibración, aunque el resultado puede estar determinado por el gran tamaño de la muestra<sup>5</sup>.

La probabilidad individual de muerte (mortalidad esperada) es un valor entre 0 (sin riesgo de muerte) y 1 (máximo riesgo de muerte), que se calculó mediante las predicciones obtenidas a partir del modelo de regresión logística estimado. El número de episodios reales de muerte detectados (mortalidad observada) se comparó con el esperado en forma de cociente para obtener la razón de mortalidad intrahospitalaria ajustada por el riesgo, de forma que si razón de mortalidad intrahospitalaria ajustada por el riesgo  $< 1$ , la mortalidad observada es menor que la esperada, y si razón de mortalidad intrahospitalaria ajustada por el riesgo  $> 1$ , es mayor<sup>5</sup>.

### **Ajuste del modelo multinivel**

Se han descrito procedimientos alternativos para el ajuste de la mortalidad por riesgo, cuyo fundamento radica en la consideración de que el riesgo de muerte de dos pacientes atendidos en el mismo hospital es más parecido de lo que sería dicho riesgo para los mismos pacientes tratados en hospitales diferentes. La probabilidad de que un paciente muera se considera una combinación de sus características de riesgo individuales (casuística) y de la calidad de la atención dispensada (funcionamiento)<sup>9-11</sup>. Al igual que en otros muchos campos de las ciencias sociales, esta similitud entre los pacientes atendidos en un mismo hospital establece una estructura de correlación intracontextual que compromete el cumplimiento de la hipótesis de independencia en que se fundamentan los modelos de regresión tradicionales, y ocasiona sesgos en la estimación de los errores estándar<sup>12</sup>. Los modelos multinivel, también conocidos como modelos jerárquicos, permiten

solucionar esta limitación<sup>13-15</sup> considerando, además de las variables demográficas y clínicas de los pacientes, un efecto aleatorio específico del nivel hospital. Siguiendo esta aproximación, se ha estimado también un modelo de regresión logística multinivel utilizando, con el objeto de facilitar la comparación de los resultados, las mismas variables consideradas en el modelo ICES 1999 para la estimación de la razón de mortalidad intrahospitalaria ajustada por el riesgo, con el método aproximado de casi-verosimilitud restringido (RIGLS) y penalizado de MIwin v2.2516. En primer lugar, se ha estimado un modelo «vacío», con solo una ordenada en origen al azar para medir la variabilidad entre hospitales (*intercept random model*) a fin de determinar si, en realidad, existe una estructura jerárquica de los datos. Posteriormente, se han introducido en el modelo las características individuales de los pacientes para averiguar en qué medida la variabilidad observada se explica por características propias. Para medir la proporción de la varianza total que se explica por las diferencias entre hospitales, se ha calculado el índice de correlación intrahospitales (ICH) mediante la expresión<sup>17</sup>:

$$ICH = \frac{\text{varianza de los residuos de nivel hospital}}{\text{varianza de los residuos del nivel hospital} + \text{varianza de los residuos del nivel paciente}}$$

Para medir la magnitud de la varianza a nivel hospitalario se ha estimado la OR mediana (ORM)<sup>18</sup> mediante la expresión<sup>19</sup>:

$$ORM = [\bullet (2 \times VA)] \times 0,6745$$

donde VA es la varianza a nivel hospitalario. En el presente estudio, la ORM representa la medida en que la probabilidad individual de muerte por IAM está determinada por las características del hospital donde se atiende al paciente. Si la ORM tuviera el valor 1, indicaría que no hay diferencias entre hospitales. Una ORM elevada indicaría que las diferencias hospitalarias son relevantes para explicar la variación de la probabilidad individual de morir por IAM.

Los resultados obtenidos, que se muestran en la tabla 4, presentan buena discriminación, mejor para la mortalidad prevista que para la esperada (0,871 frente a 0,864) y mejor o igual que la del modelo ICES 1999, e indican que aproximadamente un 3% de la varianza total resulta explicada por las diferencias entre hospitales (ICH = 0,0301) y que las diferencias entre hospitales son relevantes para explicar la variación de la probabilidad individual de morir por IAM (ORM = 1,3561).

A partir del modelo multinivel estimado, se ha calculado: *a*) la mortalidad prevista (número previsto de muertes por IAM estimado a partir de las variables individuales [*mix* de pacientes] y el componente de cada hospital correspondiente a la ordenada en el origen [funcionamiento], mediante la opción de predicciones de MIwin 2.25, incluyendo todas las variables dependientes, todos los coeficientes fijos y todos los efectos aleatorios correspondientes al nivel 2 [hospital]); *b*) la mortalidad esperada (número esperado de muertes por IAM en cada hospital, estimado a partir de las variables individuales *mix* de pacientes, y la media de los componentes de cada hospital correspondientes a la ordenada en el origen [funcionamiento estándar o «norma de funcionamiento»] mediante la opción de predicciones de MIwin 2.25, incluyendo todas las variables dependientes y todos los coeficientes fijos, pero no los efectos aleatorios correspondientes al nivel 2 [hospital]), y *c*) la razón de mortalidad intrahospitalaria estandarizada por riesgo como el cociente entre la mortalidad prevista y la esperada, multiplicado por la tasa bruta de mortalidad<sup>10,20</sup>. La razón de mortalidad intrahospitalaria estandarizada por riesgo es un valor expresado en la misma magnitud que la tasa bruta de mortalidad; si la razón de mortalidad intrahospitalaria estandarizada por riesgo de un hospital es mayor que la tasa bruta de mortalidad, significa que la probabilidad de muerte en dicho hospital a causa de factores relacionados con su funcionamiento es mayor que en la media de los hospitales considerados.

### **Comparación de ambos modelos de ajuste por riesgo**

Los resultados obtenidos utilizando SPSS 15.0 muestran que existe una elevada correlación entre las diferentes estimaciones de la mortalidad: esperada (ICES 1999), prevista (multinivel) y esperada (multinivel) con coeficientes de correlación de Pearson entre 0,990 y 1 ( $p < 0,01$ ) (fig. 1), así como buenos ajuste y discriminación, tanto con el modelo ICES 1999 (tabla 2) como con el modelo multinivel (tabla 3), mejor para este.

Los pesos de las variables de ajuste son prácticamente iguales en ambos modelos y similares a los del modelo de ajuste usado como referencia<sup>5</sup>. La variable que más peso tiene como valor predictivo de la mortalidad es la presencia de *shock*, seguida por otras relacionadas con la insuficiencia cardíaca (edema agudo de pulmón, insuficiencia renal aguda). A diferencia del modelo de referencia, la «insuficiencia renal crónica» no resulta significativa para el ajuste.

### **Agrupaciones de hospitales y carga asistencial en el infarto agudo de miocardio**

El MSSSI ha clasificado los hospitales en *clusters* en función de su complejidad (tabla 5)<sup>1</sup>.

La tabla 6 muestra la distribución por *cluster* de las altas con diagnóstico principal IAM (410) en el CMBD de los años 2009-2010.

La distribución del tipo de alta entre *cluster* no es homogénea, y los hospitales de menos de 200 camas (*clusters* 1 y 2) tienen mayor proporción de altas por muerte o traslado a otro hospital que los de alrededor de 500 camas o más (*clusters* 3-5) (tabla 7).

### **Análisis de la mortalidad intrahospitalaria por infarto agudo de miocardio ajustada por riesgo**

Utilizando SPSS 15.0, se ha estudiado la existencia de diferencias estadísticamente significativas entre las medias de la razón de mortalidad intrahospitalaria estandarizada por riesgo, que resulta de un mejor ajuste que la razón de mortalidad intrahospitalaria ajustada por el riesgo, correspondientes a las siguientes agrupaciones: *a)* tipologías de hospitales, según *clusters*; *b)* servicios que dieron el alta a los pacientes atendidos por IAM, y *c)* procedimientos realizados (angioplastia y/o fibrinólisis). La distribución de las variables de ajuste de riesgo entre las variables independientes analizadas se muestra en la tabla 8.

Existen diferencias estadísticamente significativas entre las medias de edad correspondientes a las tres agrupaciones consideradas (ANOVA,  $p < 0,05$ ) y en la distribución de los factores de riesgo y dichas agrupaciones, excepto en el caso de la asociación entre *cluster* con tumor maligno y enfermedad cerebrovascular ( $\chi^2$ ,  $p < 0,05$ ). La distribución de procedimientos por *cluster* se muestra en la tabla 9.

Por último, se ha empleado análisis de la varianza (ANOVA) de un factor con la hipótesis nula de igualdad de medias, aplicándose el test de Kruskal-Wallis al detectarse la existencia de varianzas diferentes mediante el test de Levene.

### **BIBLIOGRAFÍA**

1. Registro de altas de hospitalización (CMBD) del Sistema Nacional de Salud. Glosario de términos y definiciones. Instituto de Información Sanitaria. MSSSI. Enero de 2012 [citado 12 Jun 2012]. Disponible en: <http://pestadistico.mspsi.es>
2. Palanca I, Castro A, Macaya C, Elola FJ, Bernal JL, Paniagua JL; Grupo de Expertos. Unidades asistenciales del área del corazón. Estándares y recomendaciones. Agencia de Calidad del SNS. Madrid: MSPS; 2011. p. 28.

3. Codificación Clínica con la CIE-9-MC. Unidad Técnica de la CIE-9-MC para el Sistema Nacional de Salud. Actualización de la CIE-9-MC 2008. Comentarios y Normativa de Codificación. Boletín n.º 28. Febrero 2008 [citado 12 Jun 2012]. Disponible en: [http://www.msc.es/estadEstudios/estadisticas/normalizacion/clasifEnferm/boletines/Codificacion\\_clinica\\_n28\\_08.pdf](http://www.msc.es/estadEstudios/estadisticas/normalizacion/clasifEnferm/boletines/Codificacion_clinica_n28_08.pdf)
4. Codificación Clínica con la CIE-9-MC. Unidad Técnica de la CIE-9-MC para el Sistema Nacional de Salud. Cardiología, Hipertensión Arterial y Enfermedad Cerebrovascular. Boletín n.º 30. Madrid: Ministerio de Sanidad y Política Social; 2008 [citado 12 Jun 2012]. Disponible en: [http://www.msc.es/estadEstudios/estadisticas/normalizacion/clasifEnferm/boletines/Codificacion\\_clinica\\_n30\\_08.pdf](http://www.msc.es/estadEstudios/estadisticas/normalizacion/clasifEnferm/boletines/Codificacion_clinica_n30_08.pdf)
5. Institute for Clinical Evaluative Sciences. Cardiovascular health services in Ontario. An ICES Atlas [citado 12 Jun 2012]. Ontario: ICES; 1999. Disponible en: [http://www.ices.on.ca/webpage.cfm?site\\_id=1&org\\_id=67&morg\\_id=0&gsec\\_id=0&item\\_id=1390&type=atlas](http://www.ices.on.ca/webpage.cfm?site_id=1&org_id=67&morg_id=0&gsec_id=0&item_id=1390&type=atlas)
6. Sendra Gutiérrez JM, Sarría Santamera A, Iñigo Martínez J. Desarrollo de un modelo de ajuste por el riesgo para el infarto agudo de miocardio en España. Comparación con el modelo de Charlson y el modelo ICES. Aplicaciones para medir resultados asistenciales. Rev Esp Salud Publica. 2006;80:665-77.
7. Iezzoni LI. Dimensions of risk. En: Iezzoni LI, editor. Risk adjustment for measuring health care outcomes. 2.<sup>a</sup> ed. Ann Arbor: Health Administration Press; 1997. p. 43-168.
8. Hosmer DW, Lemeshow S. Applied logistic regression. New York: John Wiley & Sons; 1989. p. 135-86.
9. Krumholz HM, Normand SLT, Galusha DH. Risk adjustment models for AMI and HF: 30 day mortality: report prepared for the Centers for Medicare & Medicaid Services, 2005 [citado 12 Jun 2012]. Disponible en: <http://www.qualitynet.org>
10. Krumholz HM, Wang Y, Mattera JA, Wang Y, Han LF, Ingber MJ, et al. An administrative claims model suitable for profiling hospital performance based on 30-day mortality rates among patients with an acute myocardial infarction. Circulation. 2006;113:1683-92.
11. Bernheim SB, Li Z, Grad JN. 2011 Measures Maintenance Technical Report: acute myocardial infarction, heart failure, and pneumonia 30 day risk standardized readmission measures: report prepared for the Centers for Medicare & Medicaid Services, 2011 [citado 12 Jun 2012]. Disponible en: <http://www.qualitynet.org>

12. Davis K, Taylor B, Furniss D. Narrative account of tracking the rural domestic violence survivors journey: a feminist approach. *Health Care Women Int.* 2001;22:333-47.
13. Normand SLT, Glickman ME, Gatsonis CA. Statistical methods for profiling providers of medical care: issues and applications. *J Am Stat Assoc.* 1997;92:803-14.
14. Shahian DM, Normand SL, Torchiana DF, Lewis SM, Pastore JO, Kuntz RE, et al. Cardiac surgery report cards: comprehensive review and statistical critique. *Ann Thorac Surg.* 2001;72:2155-68.
15. Goldstein H, Spiegelhalter DJ. League tables and their limitations: statistical aspects of institutional performance. *J Royal Stat Soc.* 1996;159:385-444.
16. Goldstein H. *Multilevel statistical models.* London: Institute of Education, Multilevel Models Projects; 1999. p. 1-25.
17. Rasbash J, Steele F, Browne W, Prosser B. *A user's guide to MLwin 2.0.* London: Institute of Education, Multilevel Models Projects; 2004. p. 113-5.
18. Ferreira-González I, García del Blanco B, Marsal Mora JR, Ribera Solé A, Cascant Castelló P, Martí G, et al. Perfil clínico y angiográfico de los pacientes sometidos actualmente en España a la implantación de *stent* coronario liberador de fármacos. Variabilidad de sus indicaciones *off-label*. Plan de Calidad para el Sistema Nacional de Salud del Ministerio de Sanidad y Política Social. Agència d'Avaluació de Tecnologia i Recerca Mèdiques de Catalunya; 2009. Informes de Evaluación de Tecnologías Sanitarias, AATRM núm. 2007/12 [citado 5 Jun 2013]. Disponible en: [http://www.gencat.cat/salut/depsan/units/aatrm/pdf/stent\\_liberador\\_farmacos\\_pcsns\\_aatrm09.pdf](http://www.gencat.cat/salut/depsan/units/aatrm/pdf/stent_liberador_farmacos_pcsns_aatrm09.pdf)
19. Larsen K, Petersen JH, Budtz-Jorgensen E, Endahl L. Interpreting parameters in the logistic regression model with random effects. *Biometrics.* 2000;56:909-14.
20. Shahian DM, Torchiana DF, Shemin RJ, Rawn JD, Normand S-LT. The Massachusetts cardiac surgery report card: implications of statistical methodology. *Ann Thorac Surg.* 2005;80:2106-13.



**Tabla 1**

Distribución de altas por enfermedades del área del corazón en los hospitales del Sistema Nacional de Salud 2009-2010

| Diagnósticos principales al alta                                                                       | Pacientes, n (%) |
|--------------------------------------------------------------------------------------------------------|------------------|
| Fiebre reumática aguda: 390-392                                                                        | 204 (< 0,1)      |
| Enfermedad cardiaca reumática crónica: 393-398                                                         | 14.029 (2,1)     |
| Enfermedad hipertensiva: 401-405                                                                       | 48.140 (7,0)     |
| Cardiopatía isquémica: 410-414                                                                         | 234.493 (34,3)   |
| Enfermedades de la circulación pulmonar: 415-417                                                       | 31.072 (4,5)     |
| Otras formas de enfermedad cardiaca: 420-429                                                           | 353.257 (51,7%)  |
| Aneurisma de la aorta ascendente o torácica, embolia aórtica torácica:<br>441.01. 441.1, 441.2 y 444.1 | 2.589 (0,4)      |
| Total                                                                                                  | 683.784 (100)    |

**Tabla 2**Descripción de las variables (ICES 1999)<sup>5</sup>

| Variable                                 | Descripción                                                                                                            | Códigos CIE-9-CM                               | Prevalencia (%) |
|------------------------------------------|------------------------------------------------------------------------------------------------------------------------|------------------------------------------------|-----------------|
| Mortalidad intrahospitalaria (observada) | Variable dependiente.<br>1 = muerte durante el episodio de hospitalización;<br>0 = alta con motivo diferente de muerte |                                                |                 |
| Edad                                     | Cuantitativa discreta (años). 34 < edad < 95                                                                           |                                                |                 |
| Sexo                                     | Cualitativa nominal dicotómica.<br>1 = mujer; 0 = varón (categoría de referencia)                                      |                                                | 29,27           |
| <i>Shock</i>                             | Cualitativas nominales dicotómicas* .                                                                                  | 785.5                                          | 3,75            |
| Diabetes mellitus con complicaciones     | 1 = código de diagnóstico secundario presente en el registro del CMBD-H;                                               | 250.1-250.9                                    | 5,02            |
| Insuficiencia cardiaca congestiva        | 0 = código de diagnóstico secundario ausente en el registro del CMBD-H                                                 | 428.x                                          | 18,11           |
| Tumor maligno                            |                                                                                                                        | 140.0-208.9                                    | 2,77            |
| Enfermedad cerebrovascular               |                                                                                                                        | 430.0-438.x                                    | 4,26            |
| Edema de pulmón                          |                                                                                                                        | 518.4, 514.x                                   | 0,60            |
| Insuficiencia renal aguda                |                                                                                                                        | 584.x, 586.x, 788.5                            | 5,64            |
| Insuficiencia renal crónica              |                                                                                                                        | 585.x, 403.x, 404.x, 996.7, 394.2, 399.4, v451 | 9,06            |
| Arritmia                                 |                                                                                                                        | 427.0-427.9                                    | 19,30           |

\*En todos los casos, el test de la  $\chi^2$  muestra que existe asociación entre la mortalidad observada y las variables dependientes ( $p = 0,001$ ).

**Tabla 3**

Ajuste del modelo de regresión logística para la mortalidad intrahospitalaria por infarto agudo de miocardio 2009-2010 (ICES 1999)<sup>5</sup>

|                                      | B       | Wald       | OR (IC95%)               |
|--------------------------------------|---------|------------|--------------------------|
| Edad                                 | 0,0656  | 1.868,3342 | 1,0678 (1,0646-1,0710)   |
| Sexo                                 | 0,1251  | 16,7094    | 1,1333 (1,0673-1,2033)   |
| <i>Shock</i>                         | 2,9963  | 4.986,4871 | 20,012 (18,4151-21,7475) |
| Diabetes mellitus con complicaciones | 0,2500  | 22,0971    | 1,284 (1,1569-1,4251)    |
| Insuficiencia cardiaca congestiva    | 0,6973  | 524,9388   | 2,0083 (1,8920-2,1318)   |
| Tumor maligno                        | 0,8132  | 166,6578   | 2,2552 (1,9933-2,5516)   |
| Enfermedad cerebrovascular           | 0,8535  | 306,9687   | 2,348 (2,1341-2,5832)    |
| Edema de pulmón                      | 1,0567  | 95,2457    | 2,8768 (2,3267-3,5569)   |
| Insuficiencia renal aguda            | 1,0309  | 712,1634   | 2,8036 (2,5992-3,0242)   |
| Arritmia                             | 0,5678  | 347,5403   | 1,7645 (1,6622-1,8730)   |
| Constante                            | -8,3500 | 5.242,5936 | 0,0002                   |

AROC: área bajo la curva ROC; B: coeficiente de regresión; IC95%: intervalo de confianza del 95%; OR: *odds ratio*; Wald: estadístico de Wald ( $\chi^2$  con 8 grados de libertad).

La variable «Insuficiencia renal crónica» resulta no significativa.

Índices de ajuste: 2LL, 35.707,612;  $R^2$  Cox-Snell = 0,136;  $R^2$  Nagelkerke = 0,334.

Calibración:  $\chi^2$  Hosmer-Lemeshow = 92,558; gl, 8; p = 0,001.

Discriminación: AROC = 0,864 (IC95%, 0,860-0,868); p = 0,001.

**Tabla 4**

Ajuste del modelo de regresión logística multinivel para la mortalidad intrahospitalaria por infarto agudo de miocardio 2009-2010 (variables ICES 1999)<sup>5</sup>

|                                      | B      | Wald      | OR (IC95%)                |
|--------------------------------------|--------|-----------|---------------------------|
| Edad                                 | 0,065  | 1.775,073 | 1,0672 (1,0630-1,0714)    |
| Sexo                                 | 0,120  | 15,074    | 1,1275 (1,0610-1,1981)    |
| <i>Shock</i>                         | 3,061  | 4.973,497 | 21,3489 (19,6233-23,2262) |
| Diabetes mellitus con complicaciones | 0,275  | 25,898    | 1,3165 (1,1843-1,4635)    |
| Insuficiencia cardiaca congestiva    | 0,723  | 538,499   | 2,0606 (1,9391-2,1897)    |
| Tumor maligno                        | 0,816  | 164,831   | 2,2614 (1,9948-2,5637)    |
| Enfermedad cerebrovascular           | 0,859  | 303,835   | 2,3608 (2,1446-2,5988)    |
| Edema de pulmón                      | 1,079  | 94,791    | 2,9417 (2,3666-3,6567)    |
| Insuficiencia renal aguda            | 1,076  | 747,206   | 2,9329 (2,7171-3,1659)    |
| Arritmia                             | 0,584  | 359,013   | 1,7932 (1,6875-1,9055)    |
| Constante                            | -8,377 | 4.790,949 | 0,0002                    |

La variable «Insuficiencia renal crónica» resulta no significativa.

VAR = 0,102; ICH = 0,0301; OR<sub>m</sub> = 1,3561.

Discriminación: AROC mortalidad prevista = 0,871 (IC95%, 0,866-0,875); p = 0,001; AROC mortalidad esperada = 0,864 (IC95%, 0,864-0,869); p = 0,001.

B: coeficiente de regresión; IC95%: intervalo de confianza del 95%; ICH: coeficiente de correlación intrahospitalaria; OR: *odds ratio*; OR<sub>m</sub>: *odds ratio* mediana; VAR: varianza de la ordenada en el origen (*intercept*) correspondiente al nivel «hospital»; Wald: estadístico de Wald ( $\chi^2$  con 8 grados de libertad).

**Tabla 5**

Clasificación de hospitales del Sistema Nacional de Salud por complejidad

| <i>Cluster</i> | Características                                                                                                                                                                                              |
|----------------|--------------------------------------------------------------------------------------------------------------------------------------------------------------------------------------------------------------|
| 1              | Pequeños hospitales comarcales, con menos de 150 camas de media, sin apenas dotación de alta tecnología, pocos médicos y escasa complejidad atendida                                                         |
| 2              | Hospitales generales básicos, tamaño medio menor de 200 camas, mínima dotación tecnológica, con algo de peso docente y complejidad atendida algo mayor                                                       |
| 3              | Hospitales de área, de tamaño medio en torno a 500 camas. Más de 50 MIR y 269 médicos de promedio. Complejidad media (1,5 servicios complejos y <i>case mix</i> 1,01)                                        |
| 4              | Grupo de grandes hospitales, pero más heterogéneos en dotación, tamaño y actividad. Gran intensidad docente (más de 160 MIR) y elevada complejidad (4 servicios complejos de media y <i>case mix</i> > 1,20) |
| 5              | Hospitales de gran peso estructural y mucha actividad. Oferta completa de servicios. Más de 680 médicos y en torno a 300 MIR. Incluye los grandes complejos hospitalarios                                    |

MIR: médico interno residente.

Fuente: Ministerio de Sanidad, Servicios Sociales e Igualdad<sup>1</sup>.

**Tabla 6**Distribución de las altas por infarto agudo de miocardio entre *cluster*

| <i>Cluster</i> | Centros, n | Casos <sup>a</sup> , n (%) | Estancia media <sup>b</sup> | Coste medio <sup>b</sup> |
|----------------|------------|----------------------------|-----------------------------|--------------------------|
| 1              | 27         | 6.576 (6,6)                | 7,0                         | 5.671                    |
| 2              | 82         | 20.389 (20,2)              | 7,1                         | 5.564                    |
| 3              | 53         | 30.298 (30,0)              | 8,0                         | 6.948                    |
| 4              | 25         | 23.077 (22,9)              | 8,5                         | 8.147                    |
| 5              | 17         | 18.767 (18,6)              | 9,0                         | 8.076                    |
| Otros          | 10         | 2.060 (1,9)                | 7,8                         | 5.726                    |
| Total          | 214        | 100.933 (100)              | 8,1                         | 7.038                    |

<sup>a</sup>Explotación de datos CMBD\_CAR.<sup>b</sup>Ministerio de Sanidad, Política Social e Igualdad. Instituto de Información Sanitaria. Registro de altas-CMBD<sup>1</sup>.

**Tabla 7**Distribución del tipo de altas por infarto agudo de miocardio entre *clusters*

| Grupo                 | Distribución de las causas de alta, %                                |      |
|-----------------------|----------------------------------------------------------------------|------|
|                       | Tipo de alta                                                         |      |
| 1                     | Domicilio                                                            | 75,2 |
|                       | Muerte                                                               | 9,4  |
|                       | Traslado a otro hospital                                             | 13,9 |
|                       | Otras (alta voluntaria; traslado a residencia asistida, desconocida) | 1,6  |
| 2                     | Domicilio                                                            | 67,7 |
|                       | Muerte                                                               | 9,6  |
|                       | Traslado a otro hospital                                             | 21,3 |
|                       | Otras (alta voluntaria; traslado a residencia asistida, desconocida) | 1,4  |
| 3                     | Domicilio                                                            | 81,6 |
|                       | Muerte                                                               | 7,7  |
|                       | Traslado a otro hospital                                             | 9,5  |
|                       | Otras (alta voluntaria; traslado a residencia asistida, desconocida) | 1,2  |
| 4                     | Domicilio                                                            | 82,9 |
|                       | Muerte                                                               | 7,7  |
|                       | Traslado a otro hospital                                             | 8,4  |
|                       | Otras (alta voluntaria; traslado a residencia asistida, desconocida) | 1,0  |
| 5                     | Domicilio                                                            | 84,5 |
|                       | Muerte                                                               | 8,3  |
|                       | Traslado a otro hospital                                             | 6,5  |
|                       | Otras (alta voluntaria; traslado a residencia asistida, desconocida) | 0,6  |
| Otros/no clasificados | Domicilio                                                            | 73,6 |
|                       | Muerte                                                               | 10,9 |

|       |                                                                      |      |
|-------|----------------------------------------------------------------------|------|
|       | Traslado a otro hospital                                             | 14,4 |
|       | Otras (alta voluntaria; traslado a residencia asistida, desconocida) | 1,1  |
| Total | Domicilio                                                            | 79,1 |
|       | Muerte                                                               | 8,4  |
|       | Traslado a otro hospital                                             | 11,5 |
|       | Otras (alta voluntaria; traslado a residencia asistida, desconocida) | 1,1% |



**Tabla 8**

Distribución de las variables de ajuste de riesgo entre las variables independientes analizadas

|                                                      | Clusters de hospitales |       |       |       |       | Servicio de alta |       | Procedimientos |       |       |        |
|------------------------------------------------------|------------------------|-------|-------|-------|-------|------------------|-------|----------------|-------|-------|--------|
|                                                      | 1                      | 2     | 3     | 4     | 5     | CAR              | Otros | No             | Fi    | ICP   | ICP+Fi |
| Edad (años),<br>media                                | 68,27                  | 70,18 | 67,68 | 66,83 | 67,47 | 66,70            | 71,84 | 72,12          | 64,54 | 64,58 | 61,12  |
| Edad (años),<br>desviación<br>estándar               | 13,50                  | 13,45 | 13,45 | 13,37 | 13,41 | 13,31            | 13,21 | 13,16          | 13,21 | 12,62 | 11,88  |
| Mujeres, %                                           | 30,36                  | 31,62 | 28,72 | 27,07 | 29,52 | 27,28            | 35,32 | 36,84          | 23,87 | 22,67 | 18,00  |
| Shock = 1, %                                         | 2,41                   | 3,33  | 3,38  | 4,75  | 4,15  | 2,16             | 5,25  | 4,10           | 5,26  | 3,23  | 3,62   |
| Diabetes<br>mellitus con<br>complicaciones<br>= 1, % | 5,02                   | 6,01  | 4,91  | 4,49  | 4,60  | 4,14             | 7,16  | 6,93           | 3,01  | 3,38  | 2,51   |
| Insuficiencia<br>cardiaca<br>congestiva = 1,<br>%    | 19,19                  | 19,78 | 17,73 | 17,28 | 17,66 | 15,11            | 25,25 | 24,59          | 12,66 | 12,18 | 12,11  |

|                                         |       |       |       |       |       |       |       |       |       |       |       |
|-----------------------------------------|-------|-------|-------|-------|-------|-------|-------|-------|-------|-------|-------|
| Tumor maligno<br>= 1, %                 | 2,68  | 2,92  | 2,69  | 2,58  | 2,99  | 2,19  | 4,16  | 3,84  | 1,74  | 1,86  | 1,25  |
| Enfermedad<br>cerebrovascular<br>= 1, % | 4,41  | 4,48  | 4,08  | 4,06  | 4,42  | 3,23  | 6,72  | 6,15  | 3,43  | 2,50  | 1,91  |
| Edema de<br>pulmón = 1, %               | 1,04  | 0,82  | 0,53  | 0,48  | 0,45  | 0,38  | 1,10  | 0,96  | 0,44  | 0,26  | 0,34  |
| Insuficiencia<br>renal aguda = 1,<br>%  | 5,72  | 6,23  | 5,60  | 6,33  | 6,28  | 4,44  | 8,80  | 8,08  | 4,14  | 4,24  | 3,21  |
| Arritmia = 1, %                         | 17,62 | 20,21 | 18,34 | 19,45 | 20,36 | 17,47 | 22,65 | 22,37 | 20,49 | 15,97 | 17,86 |

CAR: cardiología; Fi: fibrinólisis; ICP: angioplastia (intervencionismo coronario percutáneo); No: no se realizó angioplastia o fibrinólisis durante el ingreso; Otros: servicios de alta distintos de CAR y medicina intensiva.

**Tabla 9**Distribución de procedimientos de angioplastia y fibrinólisis por *clusters* de hospitales

| <i>Cluster</i> | No            | Fi          | ICP           | Fi+ICP      | Total  |
|----------------|---------------|-------------|---------------|-------------|--------|
| 1              | 4.120 (68,9)  | 596 (10,0)  | 1.074 (18,0)  | 191 (3,2)   | 5.981  |
| 2              | 13.271 (72,8) | 1.808 (9,9) | 2.654 (14,6)  | 491 (2,7)   | 18.224 |
| 3              | 13.085 (44,9) | 1.065 (3,7) | 13.551 (46,5) | 1.417 (4,9) | 29.118 |
| 4              | 7.588 (34,1)  | 407 (1,8)   | 13.117 (58,9) | 1.162 (5,2) | 22.274 |
| 5              | 6.150 (34,3)  | 367 (2,0)   | 10.604 (59,1) | 817 (4,6)   | 17.938 |
| Sin clasificar | 1.127 (68,6)  | 76 (4,6)    | 373 (22,7)    | 66 (4,0)    | 1.642  |
| Total          | 45.341 (47,6) | 4.319 (4,5) | 41.373 (43,5) | 4.144 (4,4) | 95.177 |

Fi: fibrinólisis; ICP: angioplastia (intervencionismo coronario percutáneo); No: no se realizó angioplastia o fibrinólisis durante el ingreso.

•<sup>2</sup> para la asociación entre complejidad (*cluster*) e ICP,  $p < 0,001$ .
